# Supplementary material
Source: PubMed Central journal article supplement (PMC1948913)

**a**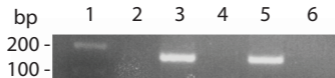

GAAT TCGGCTTAGGCCAGCAGAGA ACCGACATG GAATT GCTTCGCTTCTCGCTGCTGCTC  
 AT CCAGT CATG GCTGGG GCCCGTGCAG TTCTCAGCAGGAT TTTCACCAACAG CCTGAT GT  
 TCGGCACCTCGG ACCGTGTCTATGAGAA ACTGAA GGACCTGG AAGAGGG AA GCCGAA

**b**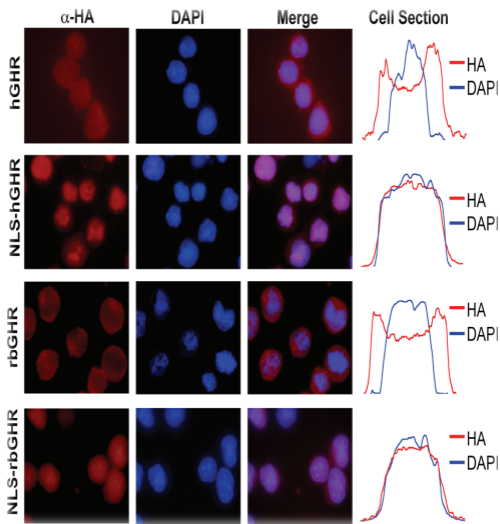

Supplement: pnas_0600181104_4.pdf [file pnas_0600181104_4.pdf]
