# Supplementary material
Source: PubMed Central journal article supplement (PMC1948913)

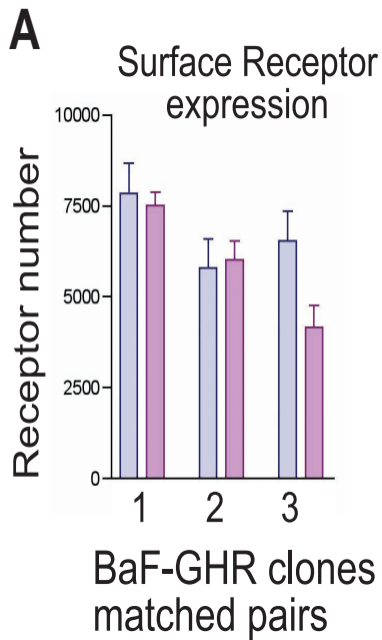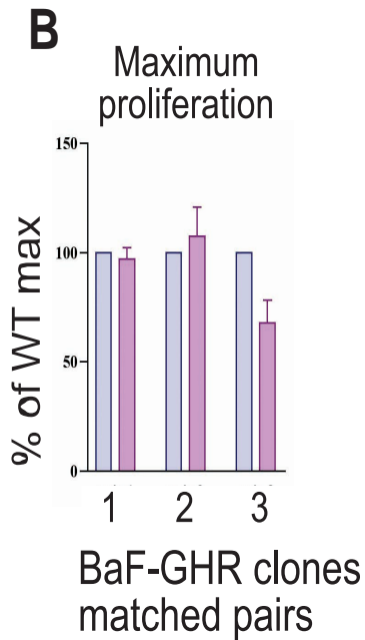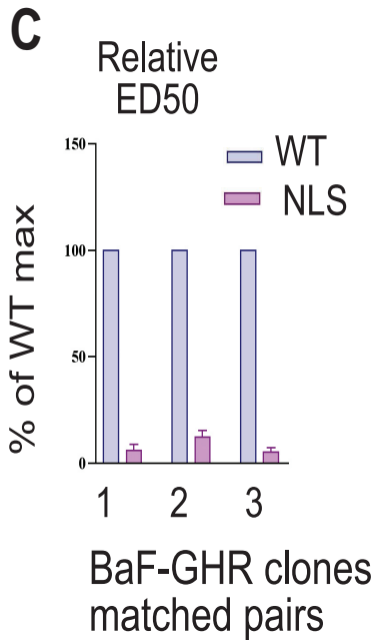

Supplement: pnas_0600181104_1.pdf [file pnas_0600181104_1.pdf]

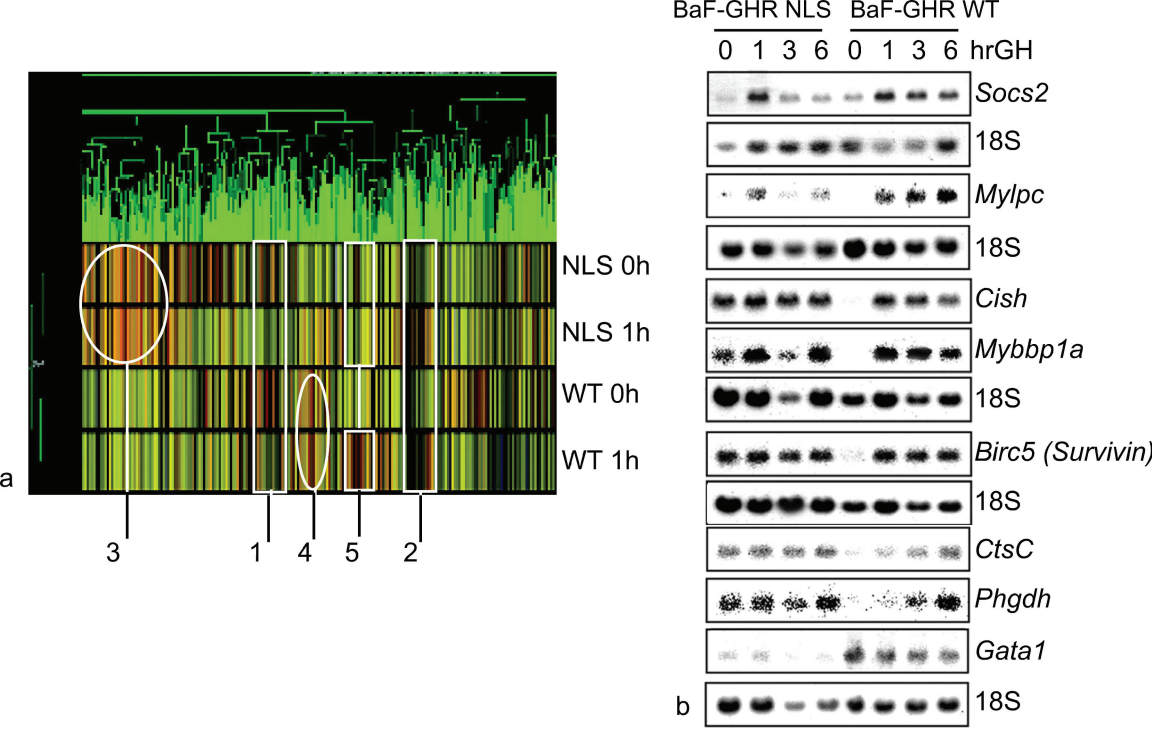

Supplement: pnas_0600181104_2.pdf [file pnas_0600181104_2.pdf]

A

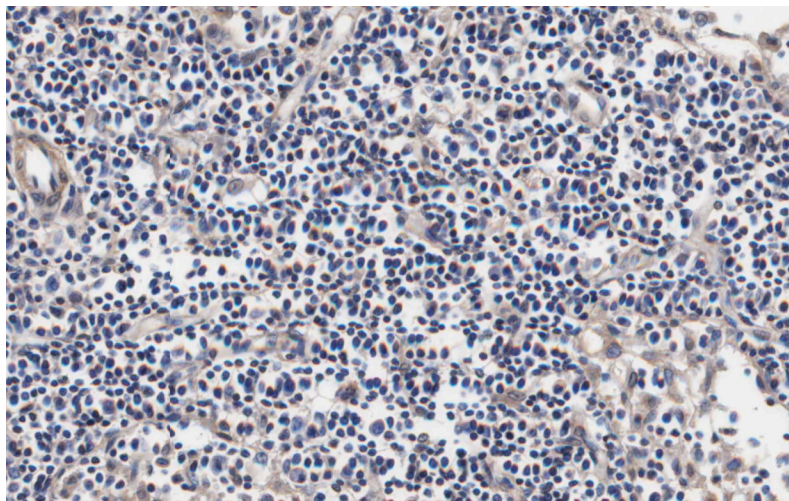

B

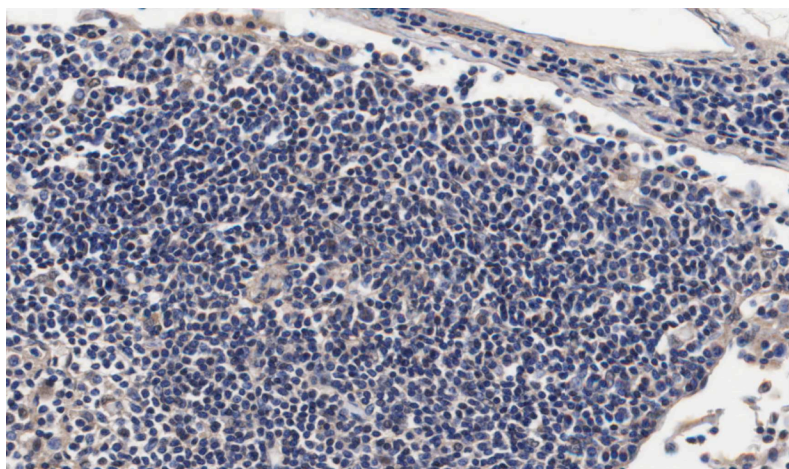

C

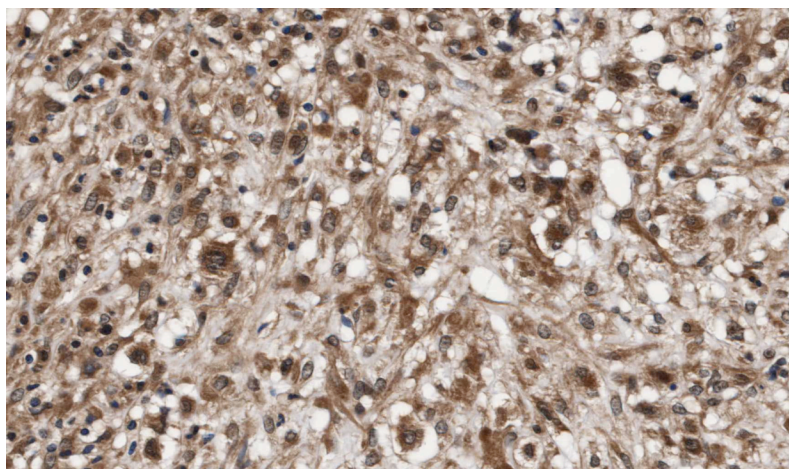

D

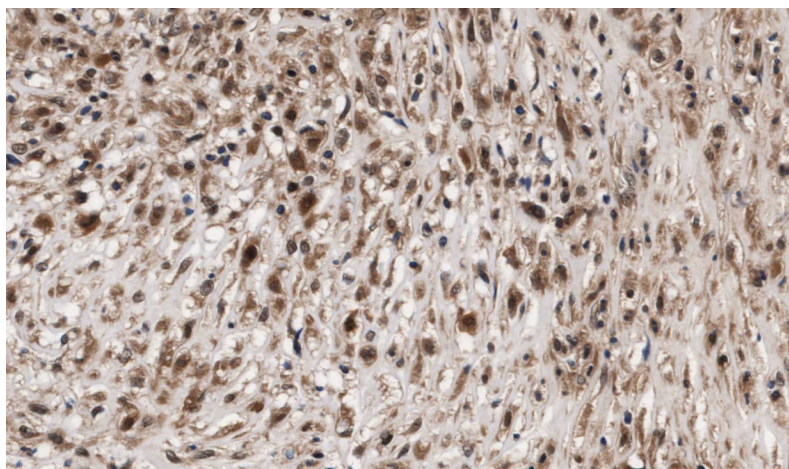

Supplement: pnas_0600181104_3.pdf [file pnas_0600181104_3.pdf]

# BaF/3 HA-WT-rGHR -GH

$\alpha$ -HA

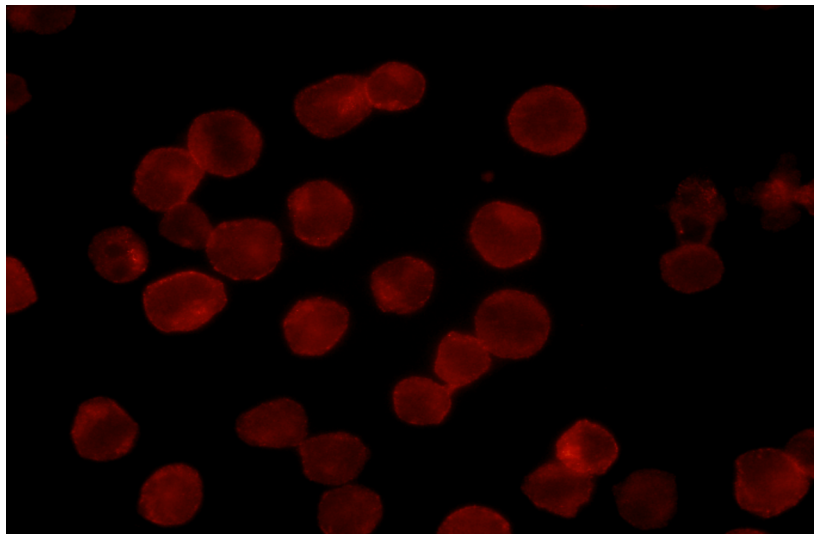

$\alpha$ -STAT5

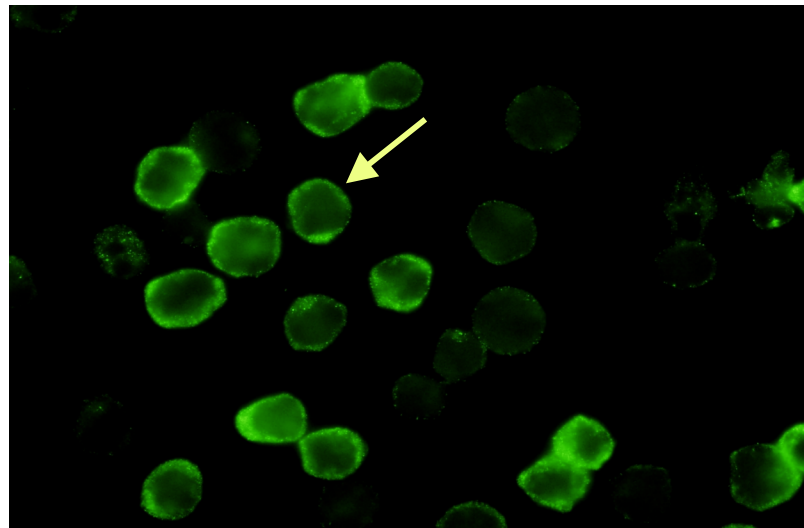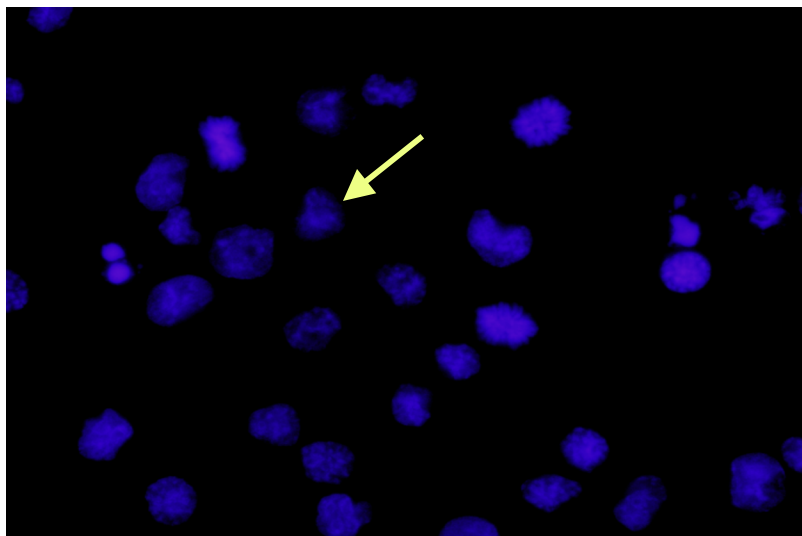

DAPI

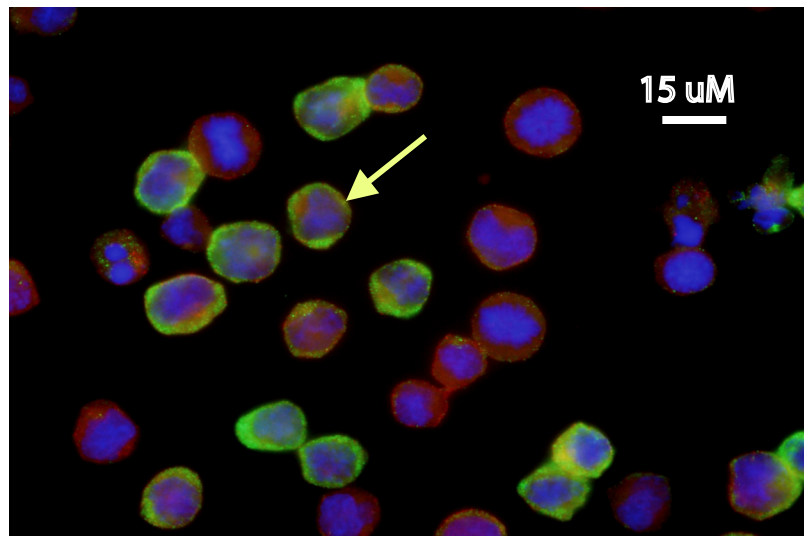

Merge

Supplement: pnas_0600181104_5.pdf [file pnas_0600181104_5.pdf]

# BaF/3HA-WT-rGHR +GH

$\alpha$ -HA

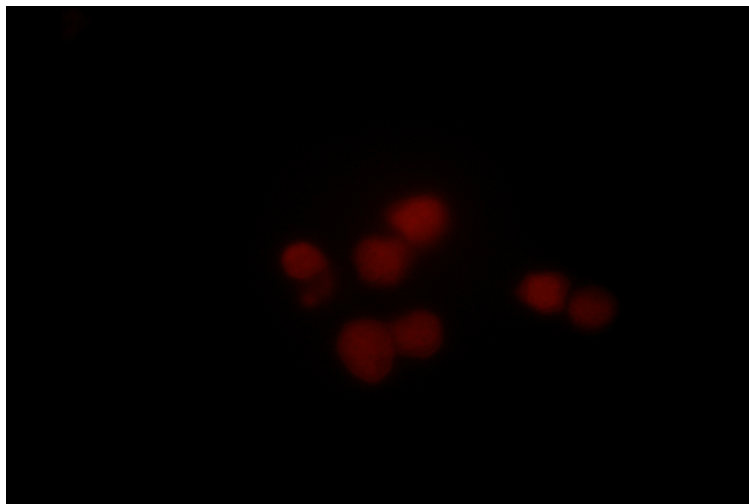

$\alpha$ -STAT5

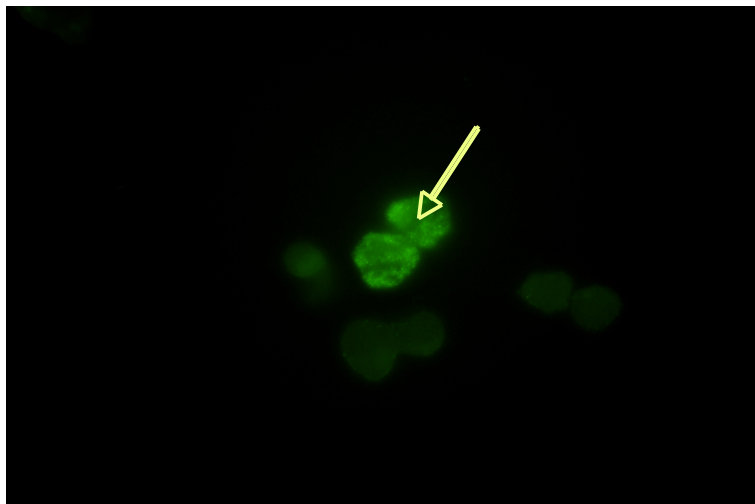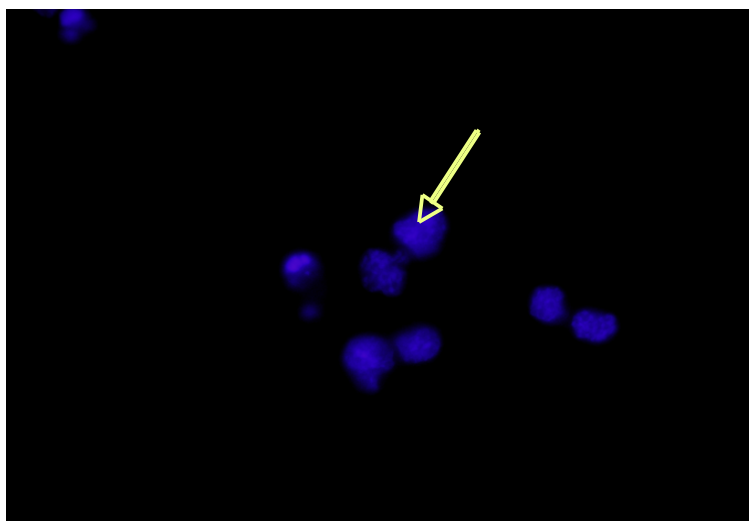

DAPI

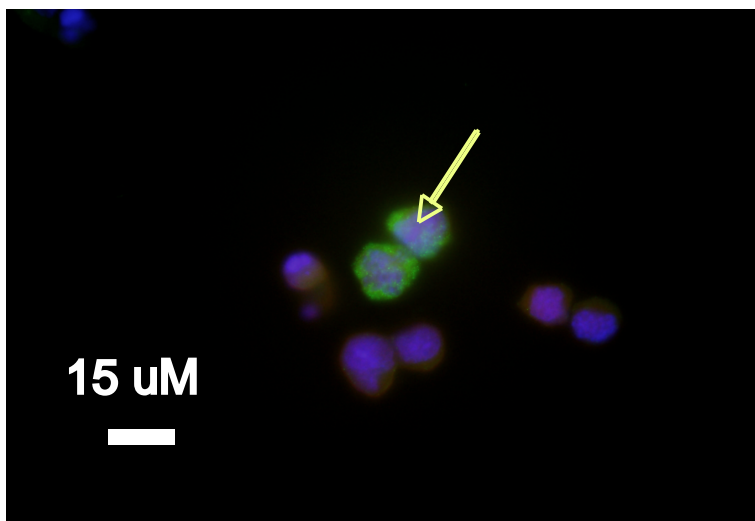

Merge

Supplement: pnas_0600181104_6.pdf [file pnas_0600181104_6.pdf]

# BaF/3 HA-NLS-rGHR -GH

$\alpha$ -HA

$\alpha$ -STAT5

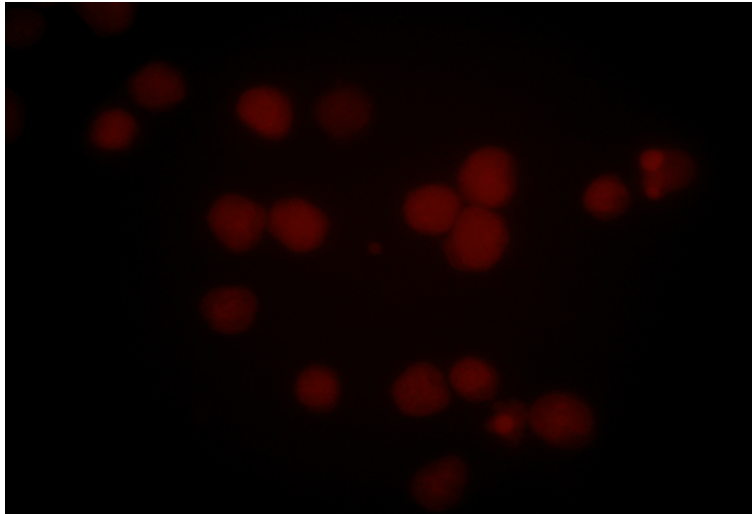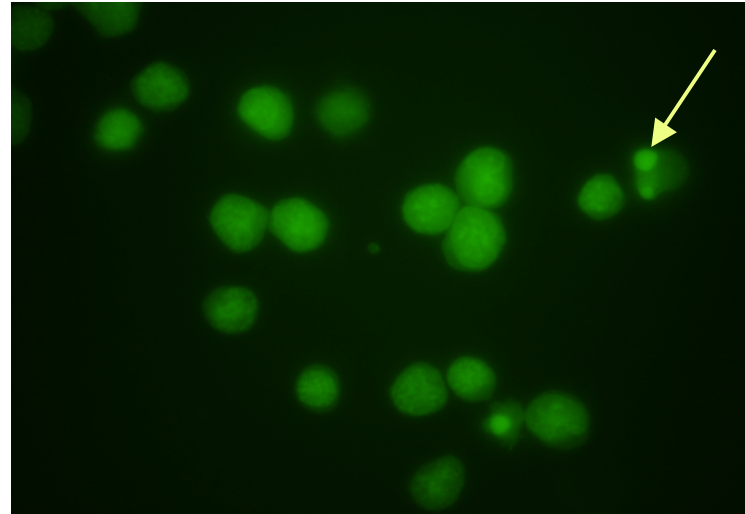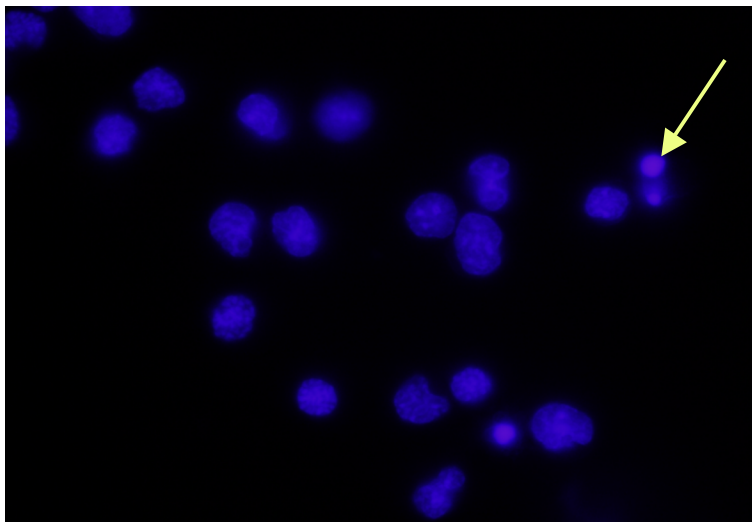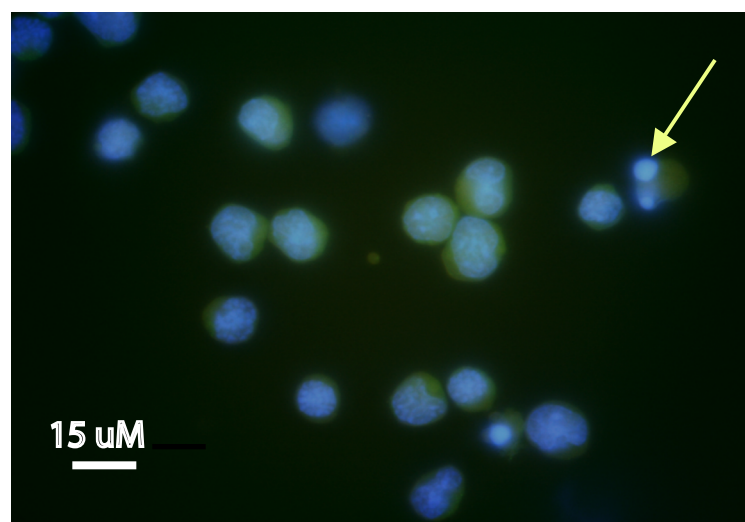

DAPI

Merge

Supplement: pnas_0600181104_7.pdf [file pnas_0600181104_7.pdf]

# BaF/3 HA-NLS-rGHR +GH

$\alpha$ -HA

$\alpha$ -STAT5

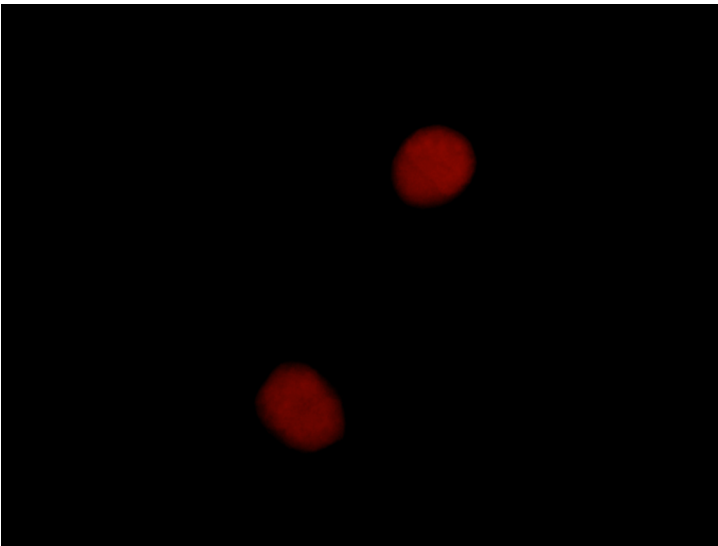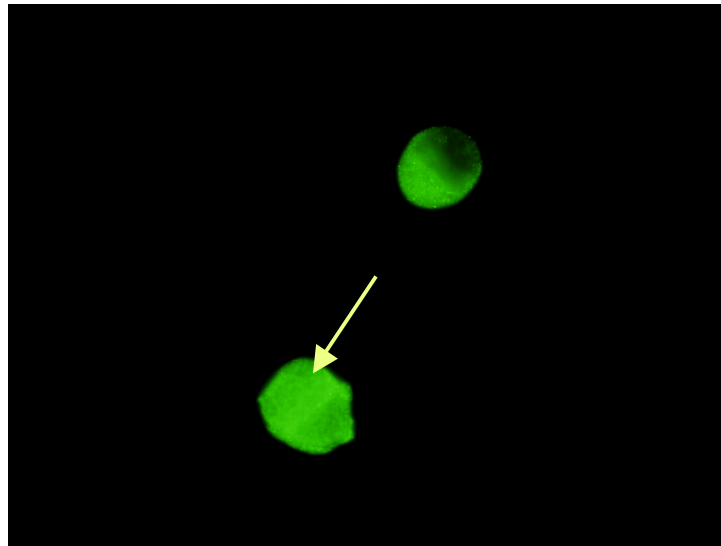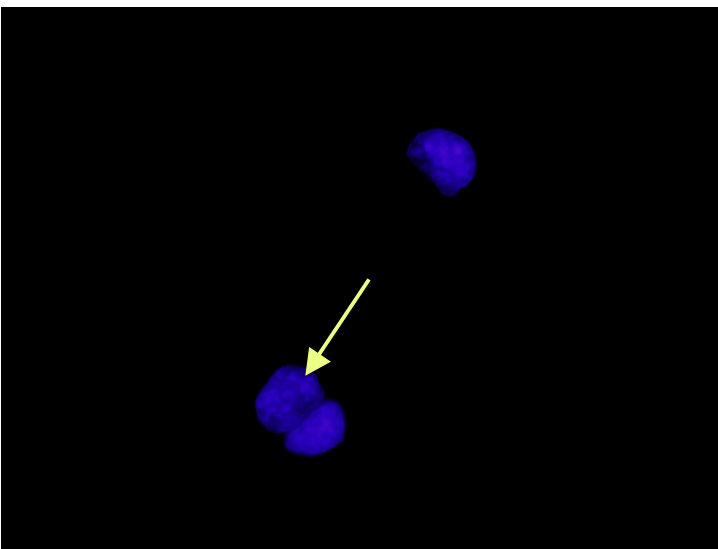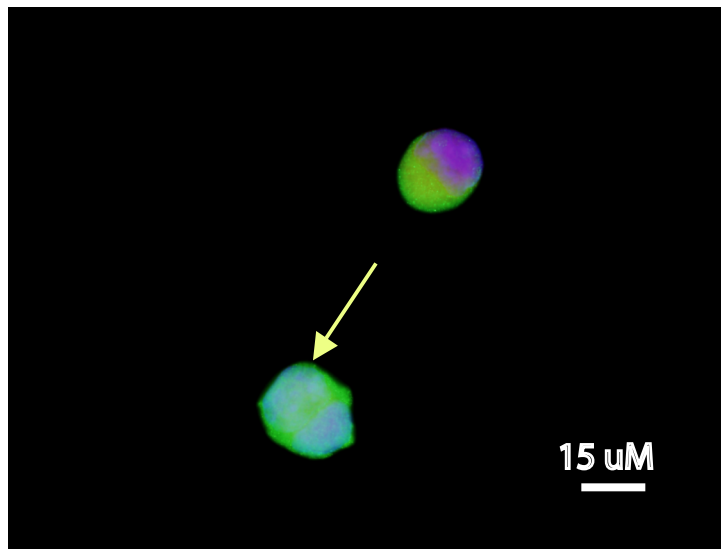

DAPI

Merge

Supplement: pnas_0600181104_8.pdf [file pnas_0600181104_8.pdf]
